# Supplementary material
Source: PubMed Central journal article supplement (PMC4369923)

Supplementary information S5 | High-resolution image file from Figure 4: Mapping genetic modifiers on proteome map

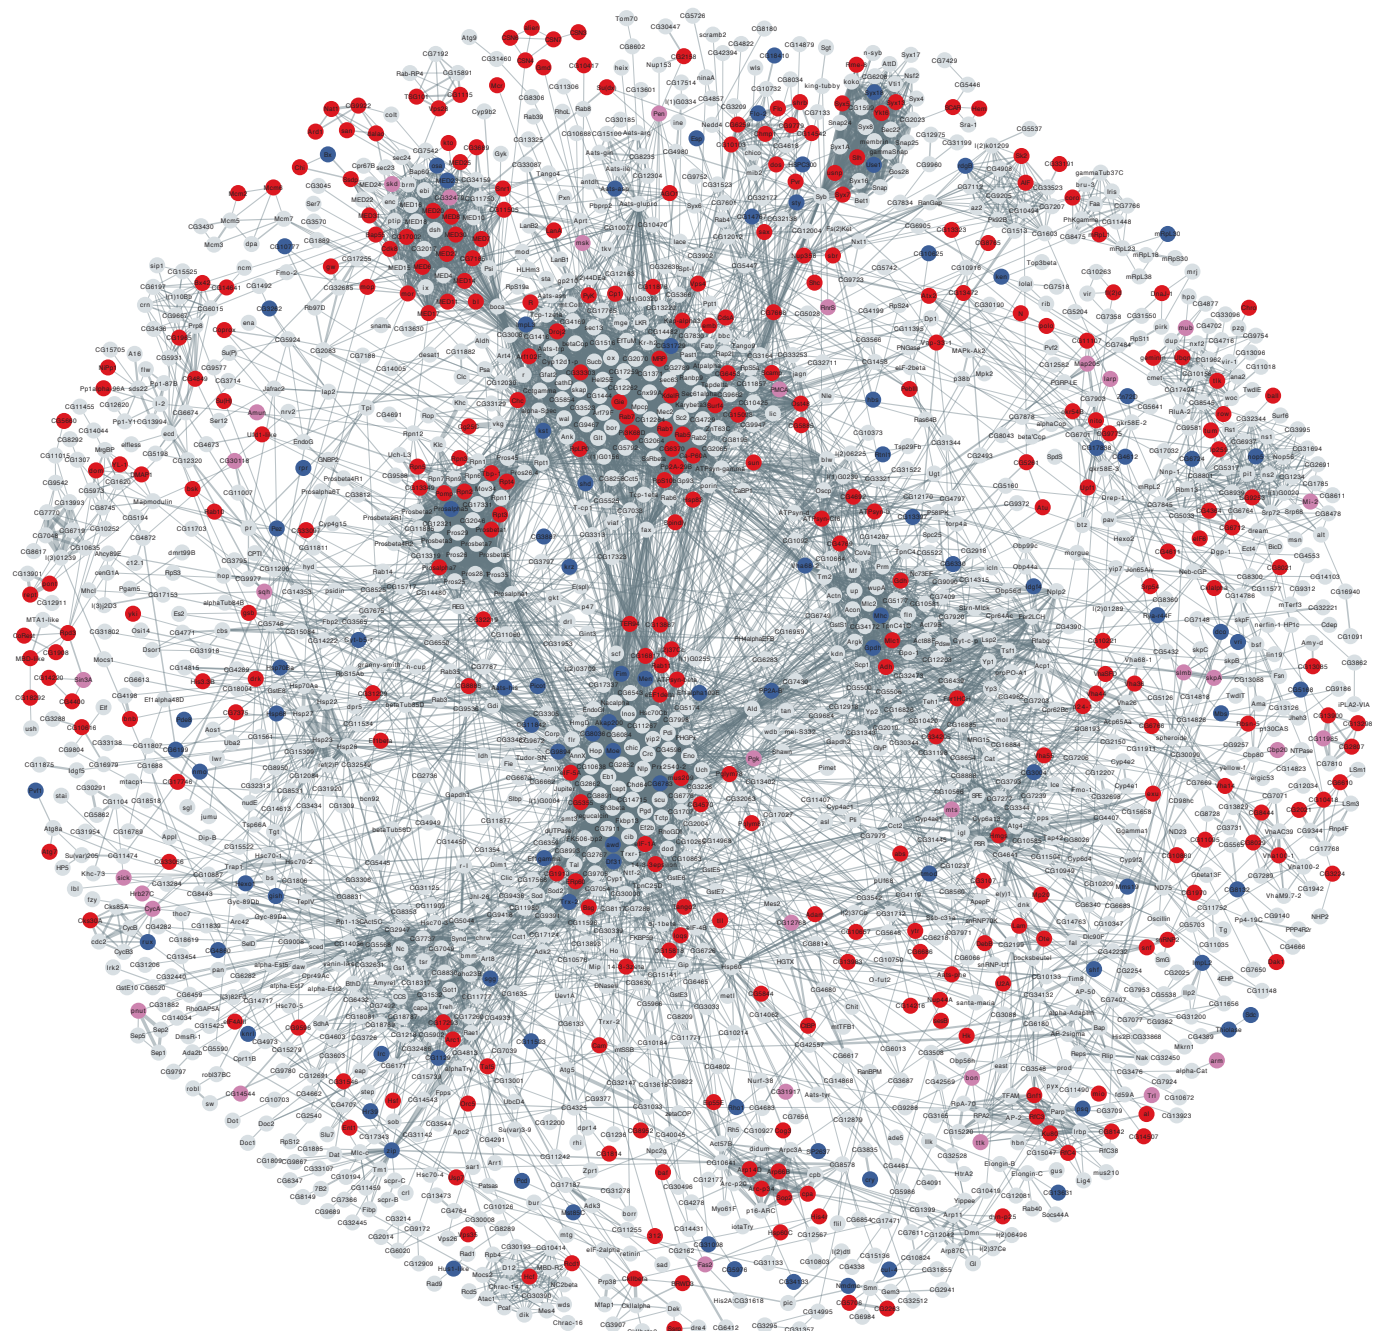

Supplement: NIHMS480095-supplement-Figure_S5.pdf [file NIHMS480095-supplement-Figure_S5.pdf]
